# Supplementary material for: Antimicrobial Use in Canadian Cow–Calf Herds
Source: MDPI journal article supplement (doi:10.3390/vetsci10050366), 2023-05-20
Supplement: s1 [file s1]

# Antibiotic Use in Canadian Cow-Calf Herds

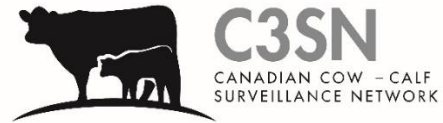

This survey is part of the research for the Canadian Cow-Calf Surveillance Network that is being conducted by researchers from the University of Saskatchewan and our collaborators at the University of Guelph, Université de Montréal and University of Calgary.

*Your participation is voluntary. All of your responses will be kept confidential. Return of the survey by mail will indicate your consent to participate and have your deidentified responses summarized in the final report.*

- **Please do not leave any blank spaces**, answer each question in the survey as best as you can. Either cross out the answer or write:
  - ❖ ‘0’s’ - there were no events in this category
  - ❖ or ‘Not Applicable’ (N/A) - does not apply to my farm
  - ❖ or ‘Don’t Know’ - we do not have records specific to this question
- Please send back each page of the survey.
- Please return the survey in the stamped envelope provided

**Please enter your full name:** \_\_\_\_\_

If you have any questions regarding the questionnaire, feel free to call:

**Sharlene April at the Western College of Veterinary Medicine**

Phone: (306) 966-7870  
or e-mail [c3sn@usask.ca](mailto:c3sn@usask.ca)

or

**Dr. Cheryl Waldner at the Western College of Veterinary Medicine**

Phone: (306) 966-7168  
or e-mail [cheryl.waldner@usask.ca](mailto:cheryl.waldner@usask.ca)

Check out our website: <https://research-groups.usask.ca/c3sn>  
Follow us on Twitter: @TheC3SN

**The intent of this questionnaire is to understand antibiotic use in Canadian cow-calf herds between July 1, 2019 and June 30, 2020.**

*For the purpose of this survey, the term antibiotic will be considered equivalent to the term antimicrobial.*

***Antibiotics or antimicrobials are used in livestock production to treat or control bacterial infections.***

*They include injectable medications, boluses, and feed and water additives such as tetracyclines, macrolides, sulfonamides and ionophores/coccidiostats.*

*They do not include vaccines, treatments for lice, dewormers or nutritional supplements.*

***Antibiotics or antimicrobials might be used to treat animals that are sick and we are trying to make them better. Antibiotics or antimicrobials might also be used in animals that do not appear to be sick, but where they are likely to become sick if nothing is done to prevent or control the disease.***

**PART A.**

**Note: This page contains important examples and definitions. Please read and refer to it as you answer the survey questions.**

Please fill out the following tables regarding the **antibiotics given to your cow-calf herd**. This includes all antibiotics which are:

- ✓ injected into muscle (IM), underneath the skin (SC) or into a blood vessel (IV)
- ✓ inserted directly into the udder (IMM)
- ✓ inserted directly into the uterus (IU)
- ✓ fed to the cattle, added to the water, or given by mouth (PO)
- ✓ applied to the surface of the eyes or skin (topical)

Please indicate:

- ✓ which antibiotics were used to treat cattle for each reason listed in the tables
- ✓ the percentage of animals treated in each age class since July 1, 2019
- ✓ the number of doses you would typically use to treat an animal for that reason with that drug
- ✓ the typical dose per animal
- ✓ the typical route of administration

**If you have not treated any animals in a specific age class with antibiotics for a particular reason since July 1, 2019, simply check the appropriate box in the first column (\*Please see the example below for Respiratory Disease in breeding females).**

You can refer to the Antibiotic Handbook for a list of currently available antibiotics to help you find the names of the products used in your herd.

**Fill out one line per antibiotic used for each reason.**

***Please refer to this example to answer the questions:***

***Breeding Females:***

| <b>Reason for Antibiotic Use</b>                                                                                                                    | <b>Which Antibiotic(s) Did You Use?</b> | <b>Percentage of Animals Treated since July 1<sup>st</sup> 2019 (select only 1 category)</b>                                                | <b>Typical Number of Doses Used/ Dose per Animal/ Route?</b> |
|-----------------------------------------------------------------------------------------------------------------------------------------------------|-----------------------------------------|---------------------------------------------------------------------------------------------------------------------------------------------|--------------------------------------------------------------|
| <b>Mammary/Udder Disease</b><br><b>e.g. mastitis</b><br><input type="checkbox"/> No animals treated for this condition since July 1, 2019           | 1. <b>Excenel</b>                       | <input type="checkbox"/> <5% <input type="checkbox"/> 31-70 %<br><input checked="" type="checkbox"/> 6-30% <input type="checkbox"/> 71-100% | 3 doses/14 mL per dose SC                                    |
|                                                                                                                                                     | 2 <b>Special Formula</b>                | <input checked="" type="checkbox"/> <5% <input type="checkbox"/> 31-70 %<br><input type="checkbox"/> 6-30% <input type="checkbox"/> 71-100% | 2 doses/ 1 tube per day IMM                                  |
|                                                                                                                                                     | 3.    ---                               | <input type="checkbox"/> <5% <input type="checkbox"/> 31-70 %<br><input type="checkbox"/> 6-30% <input type="checkbox"/> 71-100%            |                                                              |
| <b>Respiratory Disease</b><br><b>e.g. pneumonia</b><br><input checked="" type="checkbox"/> No animals treated for this condition since July 1, 2019 | 1.    ---                               | <input type="checkbox"/> <5% <input type="checkbox"/> 31-70 %<br><input type="checkbox"/> 6-30% <input type="checkbox"/> 71-100%            |                                                              |
|                                                                                                                                                     | 2.    ---                               | <input type="checkbox"/> <5% <input type="checkbox"/> 31-70 %<br><input type="checkbox"/> 6-30% <input type="checkbox"/> 71-100%            |                                                              |
|                                                                                                                                                     | 3.    ---                               | <input type="checkbox"/> <5% <input type="checkbox"/> 31-70 %<br><input type="checkbox"/> 6-30% <input type="checkbox"/> 71-100%            |                                                              |
| <b>Lameness</b><br><b>e.g. foot rot</b><br><input type="checkbox"/> No animals treated for this condition since July 1, 2019                        | 1. <b>Nuflor</b>                        | <input checked="" type="checkbox"/> <5% <input type="checkbox"/> 31-70 %<br><input type="checkbox"/> 6-30% <input type="checkbox"/> 71-100% | Day 1 & 3 / 40 ml per day IM                                 |
|                                                                                                                                                     | 2.                                      | <input type="checkbox"/> <5% <input type="checkbox"/> 31-70 %<br><input type="checkbox"/> 6-30% <input type="checkbox"/> 71-100%            |                                                              |
|                                                                                                                                                     | 3.                                      | <input type="checkbox"/> <5% <input type="checkbox"/> 31-70 %<br><input type="checkbox"/> 6-30% <input type="checkbox"/> 71-100%            |                                                              |

1. **Preweaned Calves:** *(Calves born in 2019 and treated from July 1st to weaning, as well as calves born in 2020 and treated from birth to June 30<sup>th</sup>)*

What month did you start calving in 2019? \_\_\_\_\_

What month did you start calving in 2020? \_\_\_\_\_

| Reason for Antibiotic Use                                                                                                                                                                            | Which Antibiotic(s) Did You Use? | Percentage of Animals Treated since July 1 <sup>st</sup> 2019 (select only 1 category)                                          | Typical Number of Doses Used/ Dose per Animal/ Route? |
|------------------------------------------------------------------------------------------------------------------------------------------------------------------------------------------------------|----------------------------------|---------------------------------------------------------------------------------------------------------------------------------|-------------------------------------------------------|
| <b>Umbilical infection/Navel ill</b><br><br><input type="checkbox"/> No preweaned calves treated for this reason since July 1, 2019                                                                  | 1.                               | <input type="checkbox"/> <5% <input type="checkbox"/> 31-70%<br><input type="checkbox"/> 6-30% <input type="checkbox"/> 71-100% |                                                       |
|                                                                                                                                                                                                      | 2.                               | <input type="checkbox"/> <5% <input type="checkbox"/> 31-70%<br><input type="checkbox"/> 6-30% <input type="checkbox"/> 71-100% |                                                       |
|                                                                                                                                                                                                      | 3.                               | <input type="checkbox"/> <5% <input type="checkbox"/> 31-70%<br><input type="checkbox"/> 6-30% <input type="checkbox"/> 71-100% |                                                       |
|                                                                                                                                                                                                      | 4.                               | <input type="checkbox"/> <5% <input type="checkbox"/> 31-70%<br><input type="checkbox"/> 6-30% <input type="checkbox"/> 71-100% |                                                       |
| <b>Respiratory Disease</b><br><i>e.g. pneumonia / shipping fever</i><br><br><input type="checkbox"/> No preweaned calves treated for this reason since July 1, 2019                                  | 1.                               | <input type="checkbox"/> <5% <input type="checkbox"/> 31-70%<br><input type="checkbox"/> 6-30% <input type="checkbox"/> 71-100% |                                                       |
|                                                                                                                                                                                                      | 2.                               | <input type="checkbox"/> <5% <input type="checkbox"/> 31-70%<br><input type="checkbox"/> 6-30% <input type="checkbox"/> 71-100% |                                                       |
|                                                                                                                                                                                                      | 3.                               | <input type="checkbox"/> <5% <input type="checkbox"/> 31-70%<br><input type="checkbox"/> 6-30% <input type="checkbox"/> 71-100% |                                                       |
|                                                                                                                                                                                                      | 4.                               | <input type="checkbox"/> <5% <input type="checkbox"/> 31-70%<br><input type="checkbox"/> 6-30% <input type="checkbox"/> 71-100% |                                                       |
| <b>Diarrhea / Bloat</b><br><br><i>e.g. scours / coccidiosis</i><br><br><input type="checkbox"/> No preweaned calves treated for this reason since July 1, 2019                                       | 1.                               | <input type="checkbox"/> <5% <input type="checkbox"/> 31-70%<br><input type="checkbox"/> 6-30% <input type="checkbox"/> 71-100% |                                                       |
|                                                                                                                                                                                                      | 2.                               | <input type="checkbox"/> <5% <input type="checkbox"/> 31-70%<br><input type="checkbox"/> 6-30% <input type="checkbox"/> 71-100% |                                                       |
|                                                                                                                                                                                                      | 3.                               | <input type="checkbox"/> <5% <input type="checkbox"/> 31-70%<br><input type="checkbox"/> 6-30% <input type="checkbox"/> 71-100% |                                                       |
|                                                                                                                                                                                                      | 4.                               | <input type="checkbox"/> <5% <input type="checkbox"/> 31-70%<br><input type="checkbox"/> 6-30% <input type="checkbox"/> 71-100% |                                                       |
| <b>Arthritis / Lameness</b><br><i>e.g. joint ill / foot rot</i><br><br><input type="checkbox"/> No preweaned calves treated for this reason since July 1, 2019                                       | 1.                               | <input type="checkbox"/> <5% <input type="checkbox"/> 31-70%<br><input type="checkbox"/> 6-30% <input type="checkbox"/> 71-100% |                                                       |
|                                                                                                                                                                                                      | 2.                               | <input type="checkbox"/> <5% <input type="checkbox"/> 31-70%<br><input type="checkbox"/> 6-30% <input type="checkbox"/> 71-100% |                                                       |
|                                                                                                                                                                                                      | 3.                               | <input type="checkbox"/> <5% <input type="checkbox"/> 31-70%<br><input type="checkbox"/> 6-30% <input type="checkbox"/> 71-100% |                                                       |
|                                                                                                                                                                                                      | 4.                               | <input type="checkbox"/> <5% <input type="checkbox"/> 31-70%<br><input type="checkbox"/> 6-30% <input type="checkbox"/> 71-100% |                                                       |
| <b>Disease Prevention</b><br><i>For what reason(s)?<sup>1</sup></i><br>i. _____<br>ii. _____<br><br><input type="checkbox"/> No preweaned calves given antibiotics for prevention since July 1, 2019 | 1.                               | <input type="checkbox"/> <5% <input type="checkbox"/> 31-70%<br><input type="checkbox"/> 6-30% <input type="checkbox"/> 71-100% |                                                       |
|                                                                                                                                                                                                      | 2.                               | <input type="checkbox"/> <5% <input type="checkbox"/> 31-70%<br><input type="checkbox"/> 6-30% <input type="checkbox"/> 71-100% |                                                       |
|                                                                                                                                                                                                      | 1.                               | <input type="checkbox"/> <5% <input type="checkbox"/> 31-70%<br><input type="checkbox"/> 6-30% <input type="checkbox"/> 71-100% |                                                       |
|                                                                                                                                                                                                      | 2.                               | <input type="checkbox"/> <5% <input type="checkbox"/> 31-70%<br><input type="checkbox"/> 6-30% <input type="checkbox"/> 71-100% |                                                       |
| <b>Other reason(s) for use? (please specify)</b><br>i. _____<br>ii. _____<br><br><input type="checkbox"/> No preweaned calves given antibiotics for other reason(s) since July 1, 2019               | 1.                               | <input type="checkbox"/> <5% <input type="checkbox"/> 31-70%<br><input type="checkbox"/> 6-30% <input type="checkbox"/> 71-100% |                                                       |
|                                                                                                                                                                                                      | 2.                               | <input type="checkbox"/> <5% <input type="checkbox"/> 31-70%<br><input type="checkbox"/> 6-30% <input type="checkbox"/> 71-100% |                                                       |
|                                                                                                                                                                                                      | 1.                               | <input type="checkbox"/> <5% <input type="checkbox"/> 31-70%<br><input type="checkbox"/> 6-30% <input type="checkbox"/> 71-100% |                                                       |
|                                                                                                                                                                                                      | 2.                               | <input type="checkbox"/> <5% <input type="checkbox"/> 31-70%<br><input type="checkbox"/> 6-30% <input type="checkbox"/> 71-100% |                                                       |

<sup>1</sup> Previously reported examples: antibiotics for the prevention of navel ill, scours, or pneumonia

2. Weaned Calves
(
Post-weaning for calves born in 2019 e.g. 2019-born replacement heifers, backgrounders or weaned calves pre-shipping
)

What month did you wean in 2019? \_\_\_\_\_

What % of weaned calves did you sell at weaning in 2019? \_\_\_\_\_

| Reason for Antibiotic Use                                                                                                                                                                                                            | Which Antibiotic(s) Did You Use? | Percentage of Animals Treated since July 1 <sup>st</sup> 2019<br>(select only 1 category)                                        | Typical Number of Doses Used/ Dose per Animal/ Route? |
|--------------------------------------------------------------------------------------------------------------------------------------------------------------------------------------------------------------------------------------|----------------------------------|----------------------------------------------------------------------------------------------------------------------------------|-------------------------------------------------------|
| <b>Eye Disease</b><br><i>e.g. pink eye</i><br><br><input type="checkbox"/> No post-weaned calves treated for this reason since July 1, 2019                                                                                          | 1.                               | <input type="checkbox"/> <5% <input type="checkbox"/> 31-70 %<br><input type="checkbox"/> 6-30% <input type="checkbox"/> 71-100% |                                                       |
|                                                                                                                                                                                                                                      | 2.                               | <input type="checkbox"/> <5% <input type="checkbox"/> 31-70 %<br><input type="checkbox"/> 6-30% <input type="checkbox"/> 71-100% |                                                       |
|                                                                                                                                                                                                                                      | 3.                               | <input type="checkbox"/> <5% <input type="checkbox"/> 31-70 %<br><input type="checkbox"/> 6-30% <input type="checkbox"/> 71-100% |                                                       |
|                                                                                                                                                                                                                                      | 4.                               | <input type="checkbox"/> <5% <input type="checkbox"/> 31-70 %<br><input type="checkbox"/> 6-30% <input type="checkbox"/> 71-100% |                                                       |
| <b>Respiratory Disease</b><br><i>e.g. pneumonia / shipping fever</i><br><br><input type="checkbox"/> No post-weaned calves treated for this reason since July 1, 2019                                                                | 1.                               | <input type="checkbox"/> <5% <input type="checkbox"/> 31-70 %<br><input type="checkbox"/> 6-30% <input type="checkbox"/> 71-100% |                                                       |
|                                                                                                                                                                                                                                      | 2.                               | <input type="checkbox"/> <5% <input type="checkbox"/> 31-70 %<br><input type="checkbox"/> 6-30% <input type="checkbox"/> 71-100% |                                                       |
|                                                                                                                                                                                                                                      | 3.                               | <input type="checkbox"/> <5% <input type="checkbox"/> 31-70 %<br><input type="checkbox"/> 6-30% <input type="checkbox"/> 71-100% |                                                       |
|                                                                                                                                                                                                                                      | 4.                               | <input type="checkbox"/> <5% <input type="checkbox"/> 31-70 %<br><input type="checkbox"/> 6-30% <input type="checkbox"/> 71-100% |                                                       |
| <b>Diarrhea / Bloat</b><br><i>e.g. coccidiosis</i><br><br><input type="checkbox"/> No post-weaned calves treated for this reason since July 1, 2019                                                                                  | 1.                               | <input type="checkbox"/> <5% <input type="checkbox"/> 31-70 %<br><input type="checkbox"/> 6-30% <input type="checkbox"/> 71-100% |                                                       |
|                                                                                                                                                                                                                                      | 2.                               | <input type="checkbox"/> <5% <input type="checkbox"/> 31-70 %<br><input type="checkbox"/> 6-30% <input type="checkbox"/> 71-100% |                                                       |
|                                                                                                                                                                                                                                      | 3.                               | <input type="checkbox"/> <5% <input type="checkbox"/> 31-70 %<br><input type="checkbox"/> 6-30% <input type="checkbox"/> 71-100% |                                                       |
|                                                                                                                                                                                                                                      | 4.                               | <input type="checkbox"/> <5% <input type="checkbox"/> 31-70 %<br><input type="checkbox"/> 6-30% <input type="checkbox"/> 71-100% |                                                       |
| <b>Lameness</b><br><i>e.g. foot rot / arthritis</i><br><br><input type="checkbox"/> No post-weaned calves treated for this reason since July 1, 2019                                                                                 | 1.                               | <input type="checkbox"/> <5% <input type="checkbox"/> 31-70 %<br><input type="checkbox"/> 6-30% <input type="checkbox"/> 71-100% |                                                       |
|                                                                                                                                                                                                                                      | 2.                               | <input type="checkbox"/> <5% <input type="checkbox"/> 31-70 %<br><input type="checkbox"/> 6-30% <input type="checkbox"/> 71-100% |                                                       |
|                                                                                                                                                                                                                                      | 3.                               | <input type="checkbox"/> <5% <input type="checkbox"/> 31-70 %<br><input type="checkbox"/> 6-30% <input type="checkbox"/> 71-100% |                                                       |
|                                                                                                                                                                                                                                      | 4.                               | <input type="checkbox"/> <5% <input type="checkbox"/> 31-70 %<br><input type="checkbox"/> 6-30% <input type="checkbox"/> 71-100% |                                                       |
| <b>Disease Prevention</b><br><i>e.g. pneumonia / liver abscesses</i><br>Which disease(s)?<br><br>i. _____<br><br>ii. _____<br><br><input type="checkbox"/> No post-weaned calves given antibiotics for prevention since July 1, 2019 | 1.                               | <input type="checkbox"/> <5% <input type="checkbox"/> 31-70 %<br><input type="checkbox"/> 6-30% <input type="checkbox"/> 71-100% |                                                       |
|                                                                                                                                                                                                                                      | 2.                               | <input type="checkbox"/> <5% <input type="checkbox"/> 31-70 %<br><input type="checkbox"/> 6-30% <input type="checkbox"/> 71-100% |                                                       |
|                                                                                                                                                                                                                                      | 1.                               | <input type="checkbox"/> <5% <input type="checkbox"/> 31-70 %<br><input type="checkbox"/> 6-30% <input type="checkbox"/> 71-100% |                                                       |
|                                                                                                                                                                                                                                      | 2.                               | <input type="checkbox"/> <5% <input type="checkbox"/> 31-70 %<br><input type="checkbox"/> 6-30% <input type="checkbox"/> 71-100% |                                                       |
| <b>Other reason(s) for use? (please specify)</b><br><br>i. _____<br><br>ii. _____                                                                                                                                                    | 1.                               | <input type="checkbox"/> <5% <input type="checkbox"/> 31-70 %<br><input type="checkbox"/> 6-30% <input type="checkbox"/> 71-100% |                                                       |
|                                                                                                                                                                                                                                      | 2.                               | <input type="checkbox"/> <5% <input type="checkbox"/> 31-70 %<br><input type="checkbox"/> 6-30% <input type="checkbox"/> 71-100% |                                                       |
|                                                                                                                                                                                                                                      | 1.                               | <input type="checkbox"/> <5% <input type="checkbox"/> 31-70 %<br><input type="checkbox"/> 6-30% <input type="checkbox"/> 71-100% |                                                       |
|                                                                                                                                                                                                                                      | 2.                               | <input type="checkbox"/> <5% <input type="checkbox"/> 31-70 %<br><input type="checkbox"/> 6-30% <input type="checkbox"/> 71-100% |                                                       |

3. Breeding Females: (Treated between July 1<sup>st</sup> 2019 and June 30<sup>th</sup> 2020)

| Reason for Antibiotic Use in Cows/Heifers                                                                                                                                                                          | Which Antibiotic(s) Did You Use? | Percentage of Animals Treated since July 1 <sup>st</sup> 2019 (select only 1 category)                                           | Typical Number of Doses Used/ Dose per Animal/ Route? |
|--------------------------------------------------------------------------------------------------------------------------------------------------------------------------------------------------------------------|----------------------------------|----------------------------------------------------------------------------------------------------------------------------------|-------------------------------------------------------|
| <b>Eye Disease</b><br><i>e.g. pink eye</i><br><br><input type="checkbox"/> No cows/heifers treated for this reason since July 1, 2019                                                                              | 1.                               | <input type="checkbox"/> <5% <input type="checkbox"/> 31-70 %<br><input type="checkbox"/> 6-30% <input type="checkbox"/> 71-100% |                                                       |
|                                                                                                                                                                                                                    | 2.                               | <input type="checkbox"/> <5% <input type="checkbox"/> 31-70 %<br><input type="checkbox"/> 6-30% <input type="checkbox"/> 71-100% |                                                       |
|                                                                                                                                                                                                                    | 3.                               | <input type="checkbox"/> <5% <input type="checkbox"/> 31-70 %<br><input type="checkbox"/> 6-30% <input type="checkbox"/> 71-100% |                                                       |
|                                                                                                                                                                                                                    | 4.                               | <input type="checkbox"/> <5% <input type="checkbox"/> 31-70 %<br><input type="checkbox"/> 6-30% <input type="checkbox"/> 71-100% |                                                       |
| <b>Respiratory Disease</b><br><i>e.g. pneumonia / shipping fever</i><br><br><input type="checkbox"/> No cows/heifers treated for this reason since July 1, 2019                                                    | 1.                               | <input type="checkbox"/> <5% <input type="checkbox"/> 31-70 %<br><input type="checkbox"/> 6-30% <input type="checkbox"/> 71-100% |                                                       |
|                                                                                                                                                                                                                    | 2.                               | <input type="checkbox"/> <5% <input type="checkbox"/> 31-70 %<br><input type="checkbox"/> 6-30% <input type="checkbox"/> 71-100% |                                                       |
|                                                                                                                                                                                                                    | 3.                               | <input type="checkbox"/> <5% <input type="checkbox"/> 31-70 %<br><input type="checkbox"/> 6-30% <input type="checkbox"/> 71-100% |                                                       |
|                                                                                                                                                                                                                    | 4.                               | <input type="checkbox"/> <5% <input type="checkbox"/> 31-70 %<br><input type="checkbox"/> 6-30% <input type="checkbox"/> 71-100% |                                                       |
| <b>Mammary / Udder Disease</b><br><i>e.g. mastitis</i><br><br><input type="checkbox"/> No cows/heifers treated for this reason since July 1, 2019                                                                  | 1.                               | <input type="checkbox"/> <5% <input type="checkbox"/> 31-70 %<br><input type="checkbox"/> 6-30% <input type="checkbox"/> 71-100% |                                                       |
|                                                                                                                                                                                                                    | 2.                               | <input type="checkbox"/> <5% <input type="checkbox"/> 31-70 %<br><input type="checkbox"/> 6-30% <input type="checkbox"/> 71-100% |                                                       |
|                                                                                                                                                                                                                    | 3.                               | <input type="checkbox"/> <5% <input type="checkbox"/> 31-70 %<br><input type="checkbox"/> 6-30% <input type="checkbox"/> 71-100% |                                                       |
|                                                                                                                                                                                                                    | 4.                               | <input type="checkbox"/> <5% <input type="checkbox"/> 31-70 %<br><input type="checkbox"/> 6-30% <input type="checkbox"/> 71-100% |                                                       |
| <b>Lameness</b><br><i>e.g. foot rot / arthritis</i><br><br><input type="checkbox"/> No cows/heifers treated for this reason since July 1, 2019                                                                     | 1.                               | <input type="checkbox"/> <5% <input type="checkbox"/> 31-70 %<br><input type="checkbox"/> 6-30% <input type="checkbox"/> 71-100% |                                                       |
|                                                                                                                                                                                                                    | 2.                               | <input type="checkbox"/> <5% <input type="checkbox"/> 31-70 %<br><input type="checkbox"/> 6-30% <input type="checkbox"/> 71-100% |                                                       |
|                                                                                                                                                                                                                    | 3.                               | <input type="checkbox"/> <5% <input type="checkbox"/> 31-70 %<br><input type="checkbox"/> 6-30% <input type="checkbox"/> 71-100% |                                                       |
|                                                                                                                                                                                                                    | 4.                               | <input type="checkbox"/> <5% <input type="checkbox"/> 31-70 %<br><input type="checkbox"/> 6-30% <input type="checkbox"/> 71-100% |                                                       |
| <b>Reproductive Tract Disease</b><br><i>e.g. metritis / uterine infection / retained placenta</i><br><br><input type="checkbox"/> No cows/heifers treated for this reason since July 1, 2019                       | 1.                               | <input type="checkbox"/> <5% <input type="checkbox"/> 31-70 %<br><input type="checkbox"/> 6-30% <input type="checkbox"/> 71-100% |                                                       |
|                                                                                                                                                                                                                    | 2.                               | <input type="checkbox"/> <5% <input type="checkbox"/> 31-70 %<br><input type="checkbox"/> 6-30% <input type="checkbox"/> 71-100% |                                                       |
|                                                                                                                                                                                                                    | 3.                               | <input type="checkbox"/> <5% <input type="checkbox"/> 31-70 %<br><input type="checkbox"/> 6-30% <input type="checkbox"/> 71-100% |                                                       |
|                                                                                                                                                                                                                    | 4.                               | <input type="checkbox"/> <5% <input type="checkbox"/> 31-70 %<br><input type="checkbox"/> 6-30% <input type="checkbox"/> 71-100% |                                                       |
| <b>Disease Prevention (please specify)</b><br><br>i. _____<br><br>ii. _____<br><i>e.g. coccidiosis / bloat</i><br><br><input type="checkbox"/> No cows/heifers given antibiotics for prevention since July 1, 2019 | 1.                               | <input type="checkbox"/> <5% <input type="checkbox"/> 31-70 %<br><input type="checkbox"/> 6-30% <input type="checkbox"/> 71-100% |                                                       |
|                                                                                                                                                                                                                    | 2.                               | <input type="checkbox"/> <5% <input type="checkbox"/> 31-70 %<br><input type="checkbox"/> 6-30% <input type="checkbox"/> 71-100% |                                                       |
|                                                                                                                                                                                                                    | 3.                               | <input type="checkbox"/> <5% <input type="checkbox"/> 31-70 %<br><input type="checkbox"/> 6-30% <input type="checkbox"/> 71-100% |                                                       |
|                                                                                                                                                                                                                    | 4.                               | <input type="checkbox"/> <5% <input type="checkbox"/> 31-70 %<br><input type="checkbox"/> 6-30% <input type="checkbox"/> 71-100% |                                                       |
| <b>Other reason(s) for use? (please specify)</b><br><br>i. _____<br><br>ii. _____                                                                                                                                  | 1.                               | <input type="checkbox"/> <5% <input type="checkbox"/> 31-70 %<br><input type="checkbox"/> 6-30% <input type="checkbox"/> 71-100% |                                                       |
|                                                                                                                                                                                                                    | 2.                               | <input type="checkbox"/> <5% <input type="checkbox"/> 31-70 %<br><input type="checkbox"/> 6-30% <input type="checkbox"/> 71-100% |                                                       |
|                                                                                                                                                                                                                    | 1.                               | <input type="checkbox"/> <5% <input type="checkbox"/> 31-70 %<br><input type="checkbox"/> 6-30% <input type="checkbox"/> 71-100% |                                                       |

**4. Bulls:** *(Treated between July 1<sup>st</sup> 2019 and June 30<sup>th</sup> 2020)*

| Reason for Antibiotic Use                                                                                                                                                    | Which Antibiotic(s) Did You Use? | Percentage of Animals Treated since July 1 <sup>st</sup> 2019 (select only 1 category)                                           | Typical Number of Doses Used/ Dose per Animal/ Route? |
|------------------------------------------------------------------------------------------------------------------------------------------------------------------------------|----------------------------------|----------------------------------------------------------------------------------------------------------------------------------|-------------------------------------------------------|
| <b>Eye Disease</b><br><i>e.g. pink eye</i><br><br><input type="checkbox"/> No bulls treated for this reason since July 1, 2019                                               | 1.                               | <input type="checkbox"/> <5% <input type="checkbox"/> 31-70 %<br><input type="checkbox"/> 6-30% <input type="checkbox"/> 71-100% |                                                       |
|                                                                                                                                                                              | 2.                               | <input type="checkbox"/> <5% <input type="checkbox"/> 31-70 %<br><input type="checkbox"/> 6-30% <input type="checkbox"/> 71-100% |                                                       |
|                                                                                                                                                                              | 3.                               | <input type="checkbox"/> <5% <input type="checkbox"/> 31-70 %<br><input type="checkbox"/> 6-30% <input type="checkbox"/> 71-100% |                                                       |
|                                                                                                                                                                              | 4.                               | <input type="checkbox"/> <5% <input type="checkbox"/> 31-70 %<br><input type="checkbox"/> 6-30% <input type="checkbox"/> 71-100% |                                                       |
| <b>Respiratory Disease</b><br><i>e.g. pneumonia</i><br><br><input type="checkbox"/> No bulls treated for this reason since July 1, 2019                                      | 1.                               | <input type="checkbox"/> <5% <input type="checkbox"/> 31-70 %<br><input type="checkbox"/> 6-30% <input type="checkbox"/> 71-100% |                                                       |
|                                                                                                                                                                              | 2.                               | <input type="checkbox"/> <5% <input type="checkbox"/> 31-70 %<br><input type="checkbox"/> 6-30% <input type="checkbox"/> 71-100% |                                                       |
|                                                                                                                                                                              | 3.                               | <input type="checkbox"/> <5% <input type="checkbox"/> 31-70 %<br><input type="checkbox"/> 6-30% <input type="checkbox"/> 71-100% |                                                       |
|                                                                                                                                                                              | 4.                               | <input type="checkbox"/> <5% <input type="checkbox"/> 31-70 %<br><input type="checkbox"/> 6-30% <input type="checkbox"/> 71-100% |                                                       |
| <b>Lameness</b><br><i>e.g. foot rot / arthritis</i><br><br><input type="checkbox"/> No bulls treated for this reason since July 1, 2019                                      | 1.                               | <input type="checkbox"/> <5% <input type="checkbox"/> 31-70 %<br><input type="checkbox"/> 6-30% <input type="checkbox"/> 71-100% |                                                       |
|                                                                                                                                                                              | 2.                               | <input type="checkbox"/> <5% <input type="checkbox"/> 31-70 %<br><input type="checkbox"/> 6-30% <input type="checkbox"/> 71-100% |                                                       |
|                                                                                                                                                                              | 3.                               | <input type="checkbox"/> <5% <input type="checkbox"/> 31-70 %<br><input type="checkbox"/> 6-30% <input type="checkbox"/> 71-100% |                                                       |
|                                                                                                                                                                              | 4.                               | <input type="checkbox"/> <5% <input type="checkbox"/> 31-70 %<br><input type="checkbox"/> 6-30% <input type="checkbox"/> 71-100% |                                                       |
| <b>Reproductive Tract Disease</b><br><i>e.g. penis / prepuce injury</i><br><br><input type="checkbox"/> No bulls treated for this reason since July 1, 2019                  | 1.                               | <input type="checkbox"/> <5% <input type="checkbox"/> 31-70 %<br><input type="checkbox"/> 6-30% <input type="checkbox"/> 71-100% |                                                       |
|                                                                                                                                                                              | 2.                               | <input type="checkbox"/> <5% <input type="checkbox"/> 31-70 %<br><input type="checkbox"/> 6-30% <input type="checkbox"/> 71-100% |                                                       |
|                                                                                                                                                                              | 3.                               | <input type="checkbox"/> <5% <input type="checkbox"/> 31-70 %<br><input type="checkbox"/> 6-30% <input type="checkbox"/> 71-100% |                                                       |
|                                                                                                                                                                              | 4.                               | <input type="checkbox"/> <5% <input type="checkbox"/> 31-70 %<br><input type="checkbox"/> 6-30% <input type="checkbox"/> 71-100% |                                                       |
| <b>Disease Prevention</b><br>(please describe)<br><br>i. _____<br><br>ii. _____<br><br><input type="checkbox"/> No bulls given antibiotics for prevention since July 1, 2019 | 1.                               | <input type="checkbox"/> <5% <input type="checkbox"/> 31-70 %<br><input type="checkbox"/> 6-30% <input type="checkbox"/> 71-100% |                                                       |
|                                                                                                                                                                              | 2                                | <input type="checkbox"/> <5% <input type="checkbox"/> 31-70 %<br><input type="checkbox"/> 6-30% <input type="checkbox"/> 71-100% |                                                       |
|                                                                                                                                                                              | 1.                               | <input type="checkbox"/> <5% <input type="checkbox"/> 31-70 %<br><input type="checkbox"/> 6-30% <input type="checkbox"/> 71-100% |                                                       |
|                                                                                                                                                                              | 2                                | <input type="checkbox"/> <5% <input type="checkbox"/> 31-70 %<br><input type="checkbox"/> 6-30% <input type="checkbox"/> 71-100% |                                                       |
| <b>Other reason(s) for use?</b> (please describe)<br><br>i. _____<br><br>ii. _____                                                                                           | 1.                               | <input type="checkbox"/> <5% <input type="checkbox"/> 31-70 %<br><input type="checkbox"/> 6-30% <input type="checkbox"/> 71-100% |                                                       |
|                                                                                                                                                                              | 2.                               | <input type="checkbox"/> <5% <input type="checkbox"/> 31-70 %<br><input type="checkbox"/> 6-30% <input type="checkbox"/> 71-100% |                                                       |
|                                                                                                                                                                              | 1.                               | <input type="checkbox"/> <5% <input type="checkbox"/> 31-70 %<br><input type="checkbox"/> 6-30% <input type="checkbox"/> 71-100% |                                                       |
|                                                                                                                                                                              | 2.                               | <input type="checkbox"/> <5% <input type="checkbox"/> 31-70 %<br><input type="checkbox"/> 6-30% <input type="checkbox"/> 71-100% |                                                       |

**PART B.**

**Please circle only one of the following responses to the following questions:**

1. Over the last 5 years, I have noticed the effectiveness of antibiotics for treating RESPIRATORY disease (e.g. pneumonia in a preweaned calf or shipping fever for post weaned calves) on my farm has:

INCREASED      STAYED THE SAME      DECREASED      NO OPINION
2. Over the last 5 years, I have noticed the effectiveness of antibiotics for treating GASTROINTESTINAL disease (e.g. calf scours in a 3-day old calf) on my farm has:

INCREASED      STAYED THE SAME      DECREASED      NO OPINION
3. Over the last 5 years, I have noticed the effectiveness of antibiotics for treating LAMENESS (e.g. foot rot in mature cows) on my farm has:

INCREASED      STAYED THE SAME      DECREASED      NO OPINION
4. Reports of antibiotic resistance in cattle and the potential loss of treatment effectiveness from antibiotic resistance in my herd has limited the choice of drugs used to treat sick animals in my herd in the past 5 years:

AGREE                  NEUTRAL                  DISAGREE                  NO OPINION
5. The potential for antibiotic use in cattle to impact antibiotic resistance in human medicine has limited the use of Category 1 drugs (e.g. *Excenel, Excede, Baytril*) to treat sick animals in my herd in the past 5 years:

AGREE                  NEUTRAL                  DISAGREE                  NO OPINION

For questions 6 to 9, please place an **X** beside up to 3 options that best represent your management practices. Only **X** the options you actually use. Leave the rest blank.

Please refer to this example to answer the following questions:

If your first antibiotic treatment failed in treating GASTROINTESTINAL disease, what was your next course of action in the last year?

☐ Provide no further treatment

☐ Treat with a different antibiotic

☒ Treat with a different drug/product that is not an antibiotic (Please specify): Oral electrolytes

☒ Consult a veterinarian

☐ Cull or euthanize the animal

☐ Other (Please specify) \_\_\_\_\_

6. If your first antibiotic treatment failed in treating RESPIRATORY disease (e.g. pneumonia in a preweaned calf), what was your next course of action in the last year?

☐ Provide no further treatment

☐ Treat with a different antibiotic

☐ Treat with a different drug/product that is not an antibiotic

(Please specify): \_\_\_\_\_

☐ Cull or euthanize the animal

☐ Consult a veterinarian

☐ Other (Please specify): \_\_\_\_\_

7. If your first antibiotic treatment failed in treating GASTROINTESTINAL disease (e.g. scours in a 3-day old calf), what was your next course of action in the last year?

☐ Provide no further treatment

☐ Treat with a different antibiotic

☐ Treat with a different drug/product that is not an antibiotic

(Please specify): \_\_\_\_\_

☐ Cull or euthanize the animal

☐ Consult a veterinarian

☐ Other (Please specify): \_\_\_\_\_

8. If your first antibiotic treatment failed in treating LAMENESS (e.g. foot rot in a mature cow), what was your next course of action in the last year?

☐ Provide no further treatment

☐ Treat with a different antibiotic

☐ Treat with a different drug/product that is not an antibiotic

(Please specify): \_\_\_\_\_

☐ Cull or euthanize the animal

☐ Consult a veterinarian

☐ Other (Please specify): \_\_\_\_\_

9. What are your main sources of information regarding antibiotics?

☐ Your veterinarian

☐ Feed or drug company representatives

☐ Industry/drug company websites

☐ Beef industry meetings/trade shows

☐ Friends and neighbors

☐ Government publications/ websites

☐ Nutritionists

☐ Producer publications (e.g. newspapers, magazines)

☐ Scientific journals

☐ Social media/blogs

☐ Other (Please specify): \_\_\_\_\_



**10. Select your top 3 reasons for deciding whether or not to treat a calf/cow/bull with antibiotics when it is sick: (Place an **X** beside your 3 choices)**

- ☐ Verbal (phone/in-person) recommendations from my veterinarian **for this animal**
- ☐ Written recommendations from my veterinarian **specific for this animal**
- ☐ Written treatment protocol from my veterinarian **for my herd** describing who to treat and when to treat
- ☐ Verbal (phone/in-person) advice from my veterinarian **not specific** to this animal
- ☐ Drug cost versus chance of success?
- ☐ Drug accessibility – i.e. can I buy it when I need it?
- ☐ Withdrawal time
- ☐ Whether more than 1 dose is needed
- ☐ Route of administration (under skin, in muscle, oral (bolus, in feed, in water), etc.)
- ☐ Cost of the disease in my herd (# sick, lost performance (i.e. decreased gain, pregnancy loss), # dead)
- ☐ Severity of the disease / clinical signs – i.e. how sick is the animal?
- ☐ Concern about the animal's well-being
- ☐ Potential for the drug not to work due to antibiotic resistance
- ☐ Other (Please specify): \_\_\_\_\_
- ☐ **Not applicable** – I do not use antibiotics in my animals

**11. Select your top 3 reasons for deciding which antibiotic to use in treating one of your calves/cows/bulls when it is sick: (Place an **X** beside your 3 choices)**

- ☐ Verbal (phone/in-person) recommendations from my veterinarian **for this animal**
- ☐ Written recommendations from my veterinarian **for this animal**
- ☐ Written treatment protocol from my veterinarian **for my herd** describing who to treat, when to treat, and what product to use
- ☐ Verbal (phone/in-person) advice from my veterinarian **not specific** to this animal
- ☐ Advice from a friend/neighbor/co-worker
- ☐ Drug cost versus chance of success?
- ☐ Drug accessibility – i.e. can I buy it when I need it?
- ☐ Withdrawal time
- ☐ Whether I have to mix the drug before use
- ☐ Whether the drug needs to be refrigerated
- ☐ Potential reactions or side effects of the drug (i.e. safety issues)
- ☐ Whether more than 1 dose is needed
- ☐ Route of administration (under skin, in muscle, oral (bolus, in feed, in water), etc.)
- ☐ Cost of the disease in my herd (# sick, lost performance (i.e. decreased gain, pregnancy loss), # dead)
- ☐ Severity of the disease / clinical signs – i.e. how sick is the animal?
- ☐ Concern about the animal's well-being
- ☐ Potential for antibiotic resistance to result from the use of this drug
- ☐ Potential for the drug not to work due to antibiotic resistance
- ☐ Other (Please specify): \_\_\_\_\_
- ☐ **Not applicable** – I do not use antibiotics in my animals

**12. Select your top 3 reasons for deciding how much antibiotic to use**

(e.g. how many mL/cc or boluses) **and how many doses you will give to an animal:**

(Place an **X** beside your 3 choices)

- ☐ Verbal (phone/in-person) recommendations from my veterinarian **for this animal**
- ☐ Written recommendations from my veterinarian **for this animal**
- ☐ Written treatment protocol from my veterinarian **for my herd** describing who to treat, when to treat, what product to use and how much
- ☐ Verbal (phone/in-person) advice from my veterinarian **not specific** to this animal
- ☐ Advice from a friend/neighbor/co-worker
- ☐ Use the same amount I have always used
- ☐ Based on a visual estimate of the animal's weight
- ☐ Based on a measured weight of the animal (weigh scale)
- ☐ Drug cost
- ☐ Withdrawal time
- ☐ Route of administration (under skin, in muscle, oral (bolus, in feed, in water), etc.)
- ☐ Package label instructions
- ☐ Instructions on the internet
- ☐ Other (Please specify): \_\_\_\_\_
- ☐ **Not applicable** – I do not use antibiotics in my animals

**13. Did you keep individual animal treatment records in 2019/2020?**

(e.g. Calf #62 treated for pneumonia with 30 ml Nuflor) (Check all applicable options)

- ☐ Yes – handwritten    ☐ Yes – computerized    ☐ Yes – smartphone    ☐ No

**14. Did you keep group or herd level treatment records in 2019/2020?**

*i.e. a written count of animals treated and when* (e.g. 8 calves treated for pneumonia with Nuflor)  
(Check all applicable options)

- ☐ Yes – handwritten    ☐ Yes – computerized    ☐ Yes – smartphone    ☐ No

**15. Are you aware of initiatives to increase antibiotic stewardship** (*ensuring that the beef industry uses the right antibiotics in the right animals at the right dose at the right time*)?

- ☐ Yes                      ☐ No

**16. If 'Yes' to question 15, where did you get information about this/these initiative(s)?**

(Please check all that apply)

- ☐ **Not applicable**, I am not aware of any antibiotic stewardship initiatives
- ☐ Veterinarians – verbal recommendation
- ☐ Veterinarians – written treatment protocol
- ☐ Feed or drug company representatives
- ☐ Industry/drug company websites
- ☐ Friends and neighbors
- ☐ Government publications/ websites
- ☐ Nutritionists
- ☐ Beef industry meetings/trade shows
- ☐ Producer publications (newspapers, magazines)
- ☐ Scientific journals
- ☐ Social media/blogs
- ☐ Other (Please specify): \_\_\_\_\_

17. In your opinion, how important is the issue of antibiotic resistance to the beef industry?  
(Circle the best answer)

VERY IMPORTANT    MODERATELY IMPORTANT    NOT IMPORTANT

In December 2018, there was a change to federal regulations in how livestock producers could purchase medically important antibiotics (i.e. antimicrobials important to human medicine – excludes ionophores such as Monensin) limiting them to being available only through prescriptions from veterinarians.

You can refer to the Beef Cattle Research Council website for more information:  
<http://www.beefresearch.ca/blog/prescription-required-for-livestock-cattle-antibiotics-december-2018-repost/>

18. Has antibiotic use in your herd been affected by the regulation change that came into effect December 2018? (Circle the best answer)

DECREASED                      NO CHANGE                      INCREASED

Comments: \_\_\_\_\_  
\_\_\_\_\_

19. Has your access to antibiotics changed? (Circle the best answer)

DECREASED                      NO CHANGE                      INCREASED

Comments: \_\_\_\_\_  
\_\_\_\_\_

20. Has the cost of antibiotic use in your herd changed? (Circle the best answer)

DECREASED                      NO CHANGE                      INCREASED

Comments: \_\_\_\_\_  
\_\_\_\_\_

21. How did you first become aware of the need for a prescription to buy antibiotics?  
(Please place an **X** beside the one most appropriate answer)

\_\_\_\_\_ **Not applicable**, I was not aware of a change in how antibiotics can be purchased for livestock

***I first learned about this from:***

- \_\_\_\_\_ Veterinarians
- \_\_\_\_\_ Feed or Drug Company representatives
- \_\_\_\_\_ Industry/drug company websites
- \_\_\_\_\_ Friends and neighbors
- \_\_\_\_\_ Government publications/ websites
- \_\_\_\_\_ Nutritionists
- \_\_\_\_\_ Beef industry meetings/trade shows
- \_\_\_\_\_ Producer publications (e.g. newspapers, magazines)
- \_\_\_\_\_ Scientific journals
- \_\_\_\_\_ Social media/blogs
- \_\_\_\_\_ Webinars
- \_\_\_\_\_ I don't remember
- \_\_\_\_\_ Other (Please specify): \_\_\_\_\_

**22. What percentage of treatments for sick animals do you administer using a remote delivery system for antibiotics** (i.e. tools to help administer injectable antibiotics to cattle that you cannot restrain in a chute system/head gate/squeeze)?

*(Please enter the best estimate of the percentage of treatments (%) next to all that apply.)*

- \_\_\_\_\_ **Not applicable**, we have only administered antibiotics to animals restrained in a chute system, head gate, squeeze or stanchion/tied-stalls
  
- \_\_\_\_\_ Dart gun with medicinal delivery dart
- \_\_\_\_\_ Cross bow with medicinal delivery dart
- \_\_\_\_\_ Blow gun with medicinal delivery dart
- \_\_\_\_\_ Pole syringe
- \_\_\_\_\_ Rope and restrain on pasture with traditional syringe
- \_\_\_\_\_ In feed or water
- \_\_\_\_\_ Other (Please specify): \_\_\_\_\_

Comments: \_\_\_\_\_  
\_\_\_\_\_

**23. Do you have any other comments related to antibiotic use, antibiotic resistance, or the need for antibiotic stewardship in the beef industry?**

\_\_\_\_\_

\_\_\_\_\_

\_\_\_\_\_

\_\_\_\_\_

\_\_\_\_\_

\_\_\_\_\_

\_\_\_\_\_

\_\_\_\_\_

\_\_\_\_\_

**24. Would you be willing to share a copy of your individual animal treatment records with the study in 2021? (please circle one)**

YES                      MAYBE                      NO

- For example, cow #U42 treated for footrot with Draxxin July 23<sup>rd</sup>.*
- Each herd providing their completed treatment records for the year will receive an additional \$300 incentive from the project.
  - We will be interested in individual animal and group treatment records collected from January 1, 2021 to December 31, 2021.
  - We can provide you with a paper-based or smartphone-based treatment records system for data collection if you would like, or we can use a clear copy, scan or good quality cell phone picture of whatever record system you are using now.
